# Supplementary material
Source: MDPI journal article supplement (https://www.mdpi.com/2071-1050/16/1/50)
Supplement: s1 [file s1]

Supplementary

# Long-Term Anaerobic Digestion of Seasonal Fruit and Vegetable Waste Using a Leach-Bed Reactor Coupled to an Upflow Anaerobic Sludge Bed Reactor

Achilleas Kalogiannis, Vasileios Diamantis, Alexandros Eftaxias and Katerina Stamatelatou \*

Department of Environmental Engineering, Democritus University of Thrace, Vas. Sofias 12, GR 67132 Xanthi, Greece; achkalog@env.duth.gr (A.K.); bdiamant@env.duth.gr (V.D.); alexeftaxias@gmail.com (A.E.)

\* Correspondence: [astamat@env.duth.gr](mailto:astamat@env.duth.gr) (K.S.); Tel.: +30-2541-079315

**Table S1.** Composition of the fruit and vegetable waste mixtures used in this study.

|                         | S1             | S2             | S3             | S1            | S2            | S3            |
|-------------------------|----------------|----------------|----------------|---------------|---------------|---------------|
| Fruits–Vegetables       | Weight (g)     |                |                | %             |               |               |
| Apple                   | 100.07         | 100.36         | 100.21         | 5.04          | 5.00          | 5.00          |
| Apricot                 |                | 140.93         |                |               | 7.02          |               |
| Cabbage Leaves          | 80.33          | 60.06          | 40.62          | 4.05          | 2.99          | 2.03          |
| Cherry                  |                |                | 120.20         |               |               | 6.00          |
| Grape                   |                |                | 120.14         |               |               | 6.00          |
| Grapefruit              | 100.29         |                |                | 5.05          |               |               |
| Kiwi                    |                |                | 100.00         | 0.00          | 0.00          | 4.99          |
| Lemons                  | 20.30          | 60.05          | 80.16          | 1.02          | 2.99          | 4.00          |
| Loquat                  |                | 140.09         |                |               | 6.98          |               |
| Mandarin                | 120.19         |                |                | 6.06          |               |               |
| Melon                   |                |                | 120.03         | 0.00          |               | 5.99          |
| Orange                  | 240.19         |                |                | 12.10         |               | 0.00          |
| Peach                   |                | 80.25          | 140.29         | 0.00          | 4.00          | 7.00          |
| Pear                    | 80.20          | 120.06         | 120.32         | 4.04          | 5.98          | 6.00          |
| Pomegranate             | 30.25          |                |                | 1.52          |               |               |
| Strawberries            |                | 140.02         |                |               | 6.97          |               |
| Watermelon              |                | 80.32          | 160.02         |               | 4.00          | 7.99          |
| Carrot leaves           | 160.00         | 100.43         | 40.13          | 8.06          | 5.00          | 2.00          |
| Cauliflower leaves      | 100.00         | 80.32          | 40.30          | 5.04          | 4.00          | 2.01          |
| Celery                  | 60.04          | 40.80          | 20.14          | 3.03          | 2.03          | 1.00          |
| Coriander               | 40.28          | 40.08          | 20.01          | 2.03          | 2.00          | 1.00          |
| Fennel                  | 120.60         | 61.94          | 30.02          | 6.08          | 3.09          | 1.50          |
| Green onion             | 160.00         | 100.23         | 40.21          | 8.06          | 4.99          | 2.01          |
| Parsley                 | 80.29          | 60.06          | 30.04          | 4.05          | 2.99          | 1.50          |
| Broccoli                | 80.16          | 60.18          |                | 4.04          | 3.00          |               |
| Courgette               | 60.31          | 60.15          | 60.46          | 3.04          | 3.00          | 3.02          |
| Cucumber                | 40.17          | 60.01          | 100.14         | 2.02          | 2.99          | 5.00          |
| Eggplant                | 40.04          | 40.00          | 80.12          | 2.02          | 1.99          | 4.00          |
| Green beans             | 50.13          |                |                | 2.53          |               |               |
| lettuce                 |                | 60.04          | 40.03          |               | 2.99          | 2.00          |
| Peas (with green cover) |                | 80.08          |                |               | 3.99          |               |
| Pepper                  | 40.28          | 41.08          | 80.04          | 2.03          | 2.05          | 3.99          |
| Potato                  | 40.21          | 160.05         | 40.02          | 2.03          | 7.97          | 2.00          |
| Tomato                  | 140.06         | 40.07          | 280.03         | 7.06          | 2.00          | 13.98         |
| <b>Sum</b>              | <b>1984.38</b> | <b>2007.69</b> | <b>2003.67</b> | <b>100.00</b> | <b>100.00</b> | <b>100.00</b> |

S1: autumn/winter, S2: spring, S3: summer.

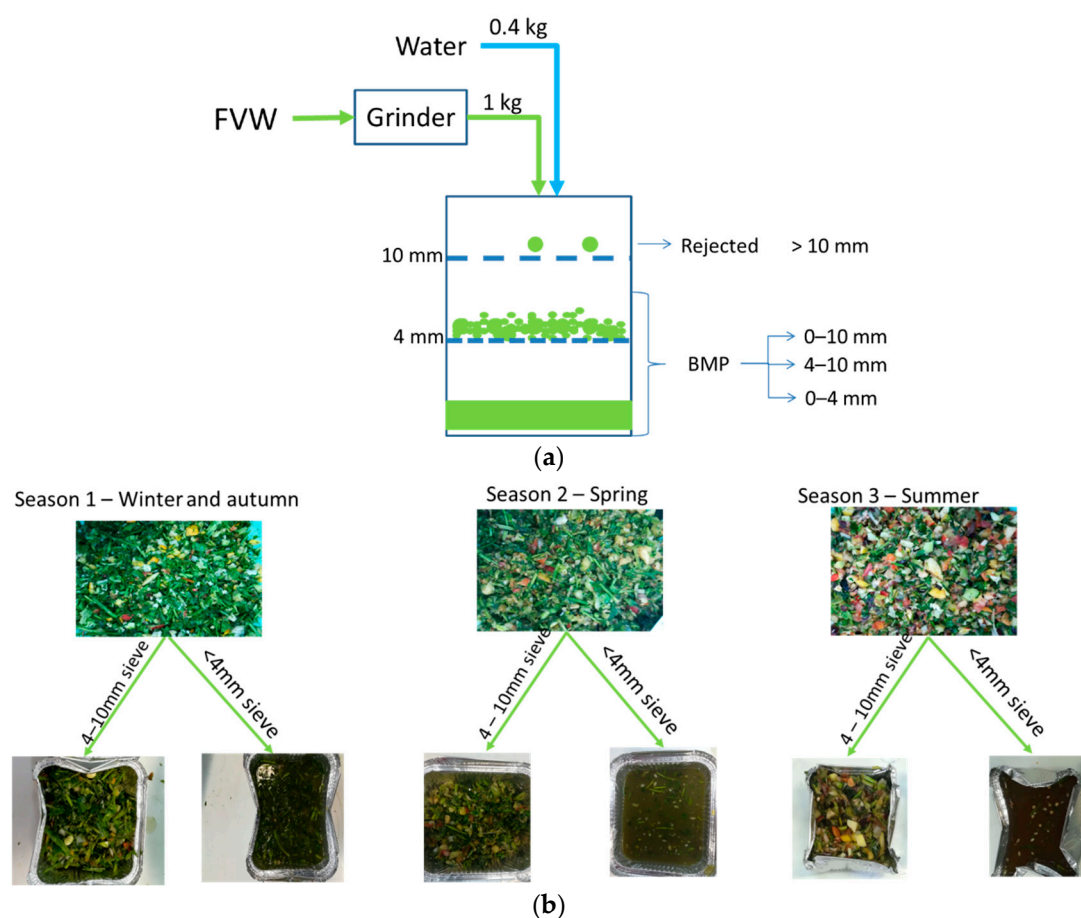

**Figure S1.** FVW fractionation: (a) schematic presentation of the procedure followed; (b) photographs of the fractions taken from the seasonal FVW mixtures.

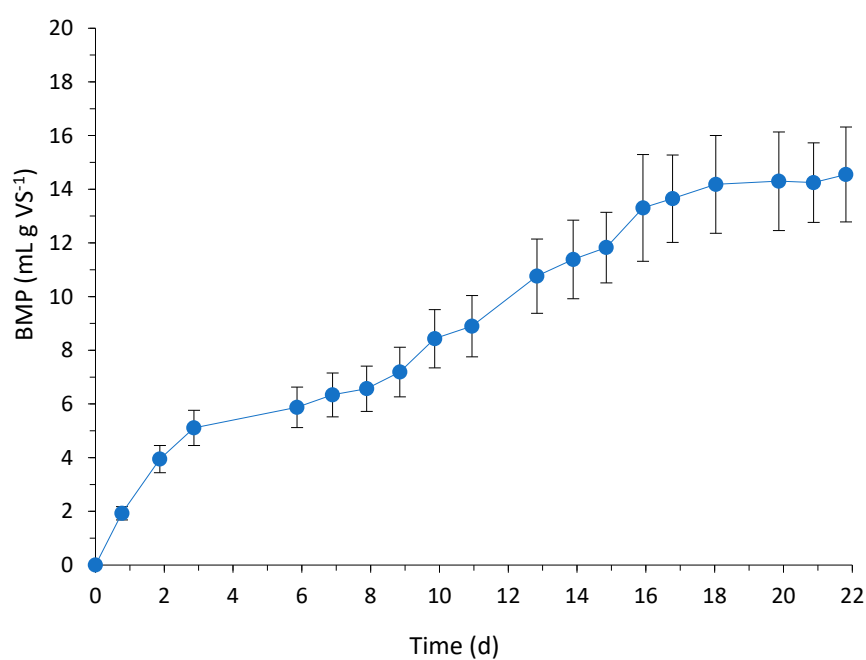

**Figure S2.** BMP of wood chips.

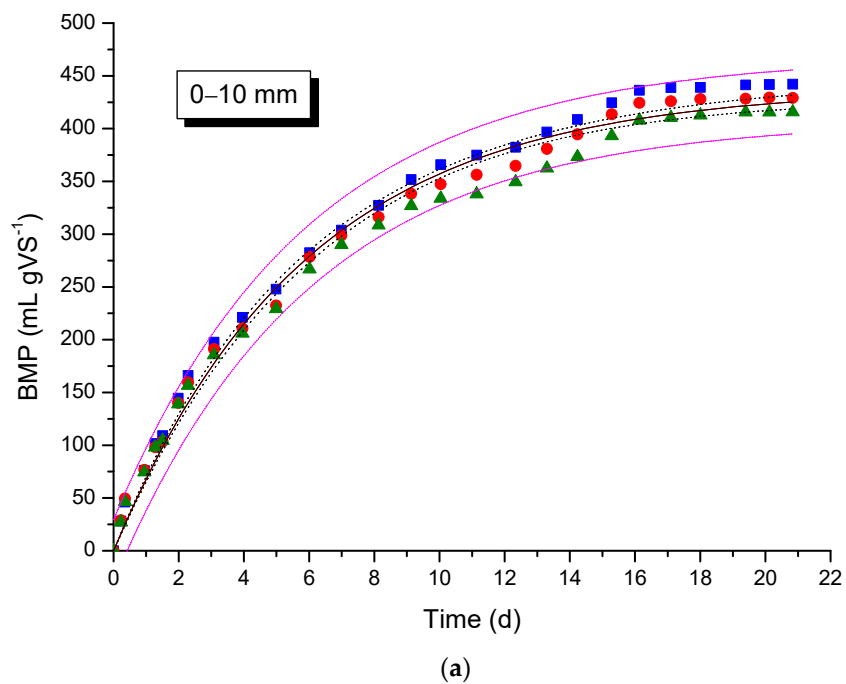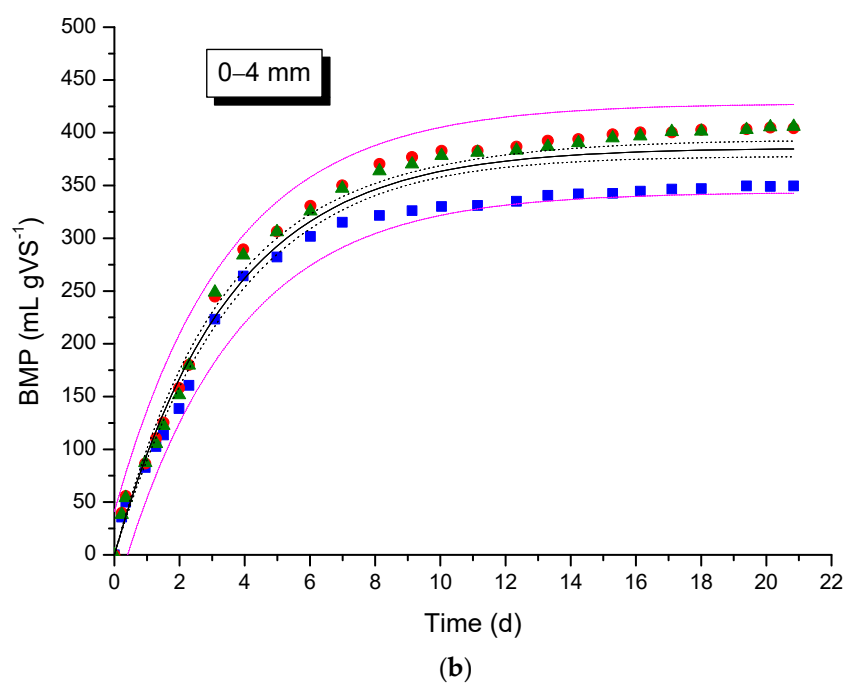

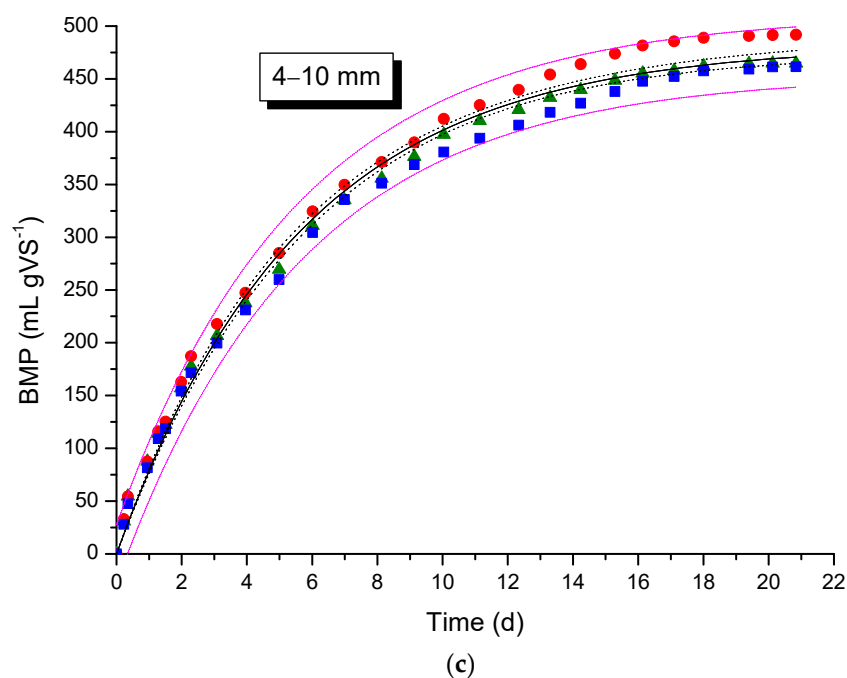

**Figure S3.** BMP of the S1 mixture chopped in the 0–10 mm fraction (a) before and (b)–(c) after separation into two individual sub-fractions (0–4 mm and 4–10 mm, respectively). Points represent the experimental data obtained in three replicates. The lines depict the analysis of the first-order kinetics model fitting (black solid line: model, black dotted lines: confidence band at 95% confidence level, magenta dotted lines: prediction band at 95% confidence level).

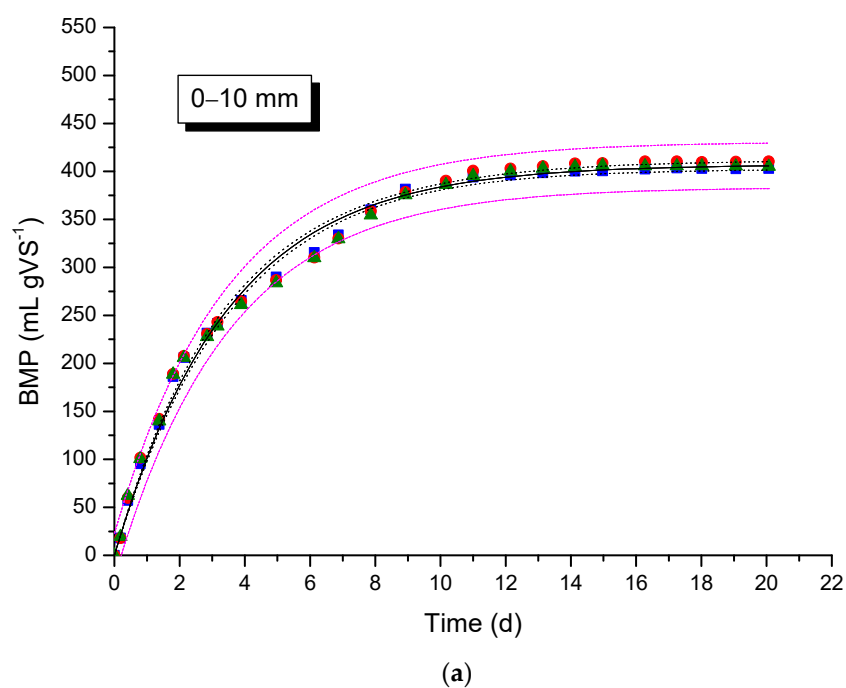

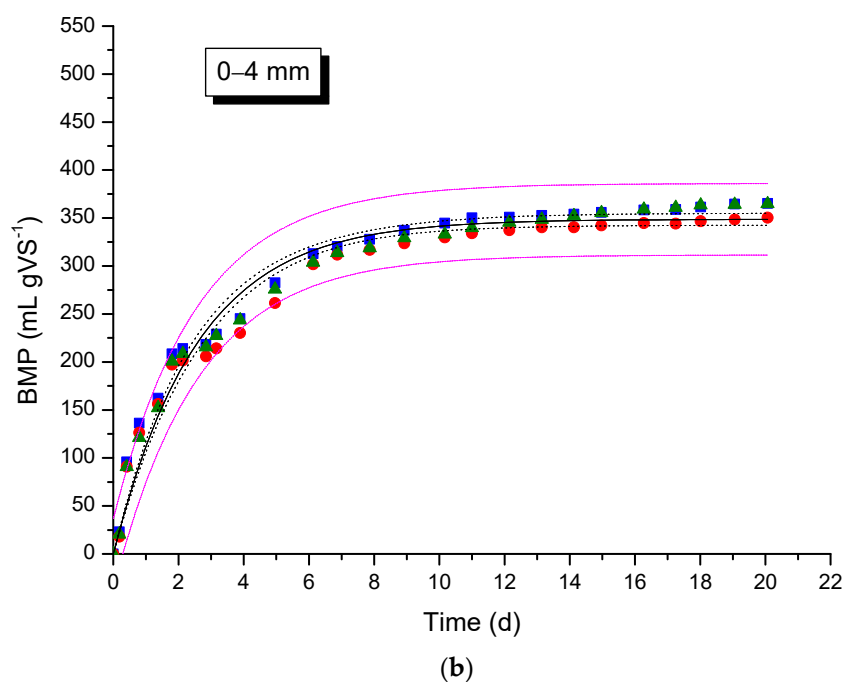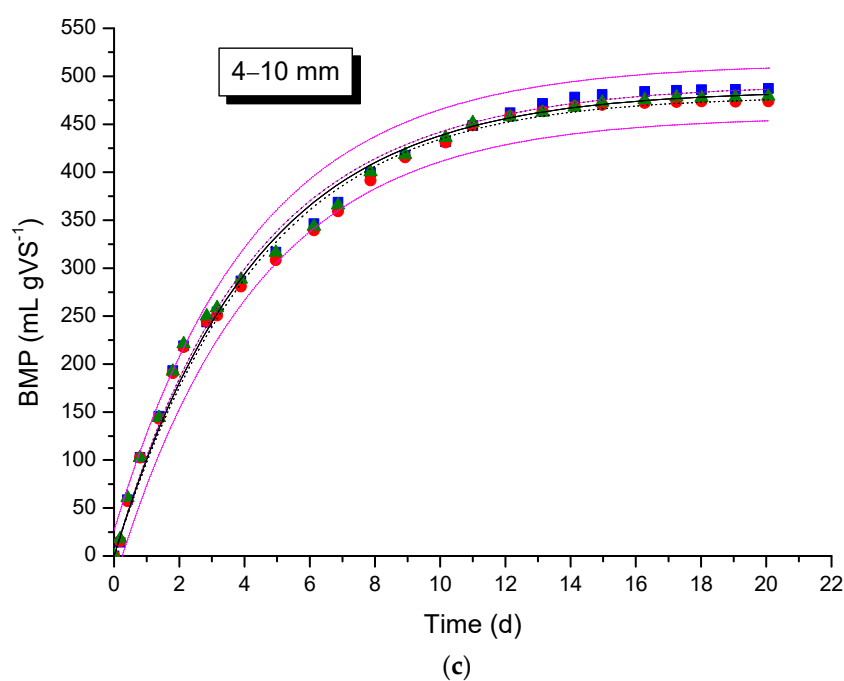

**Figure S4.** BMP of the S2 mixture chopped in the 0–10 mm fraction (a) before and (b)–(c) after separation into two individual sub-fractions (0–4 mm and 4–10 mm, respectively). Points represent the experimental data obtained in three replicates. The lines depict the analysis of the first-order kinetics model fitting (black solid line: model, black dotted lines: confidence band at 95% confidence level, magenta dotted lines: prediction band at 95% confidence level).

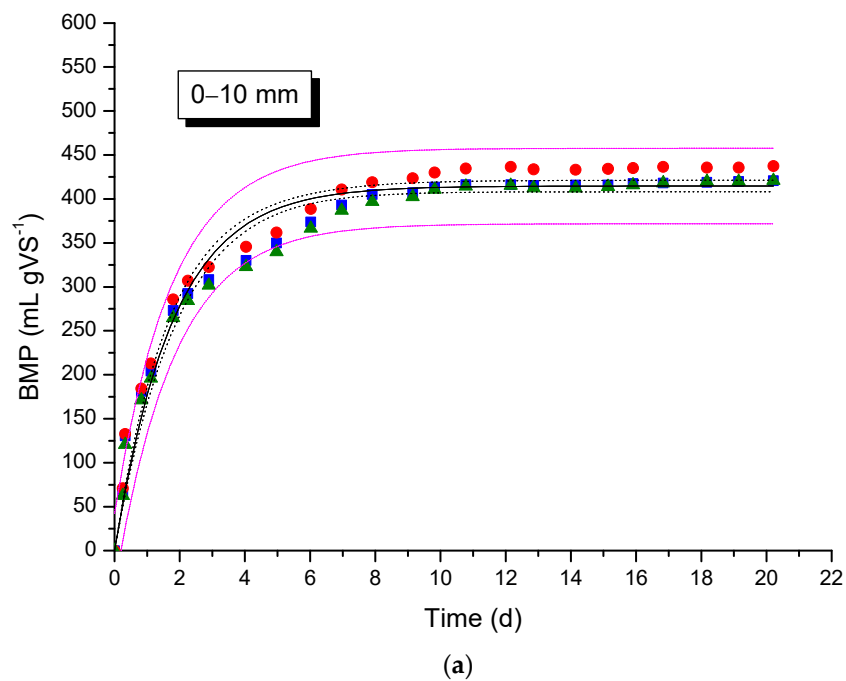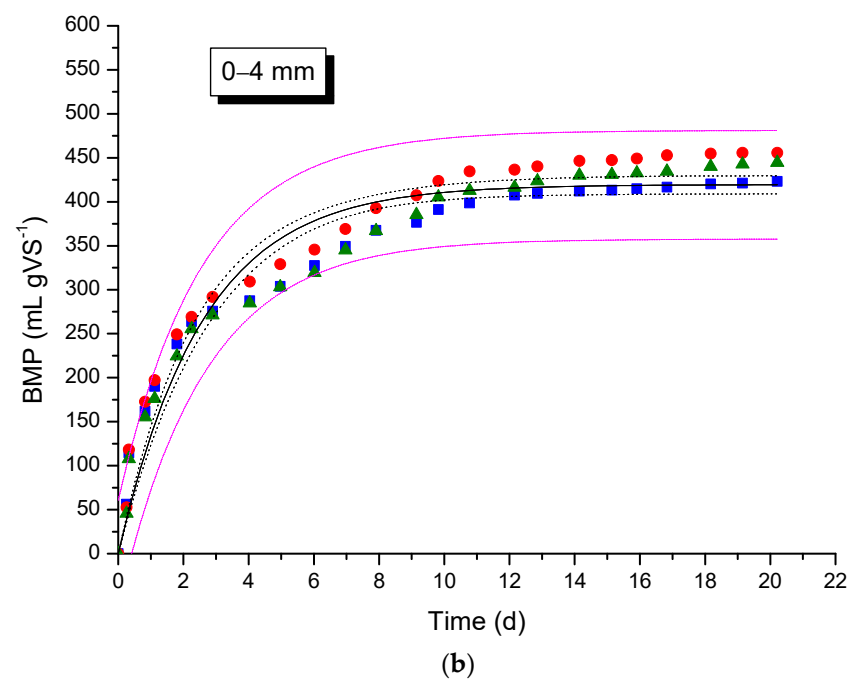

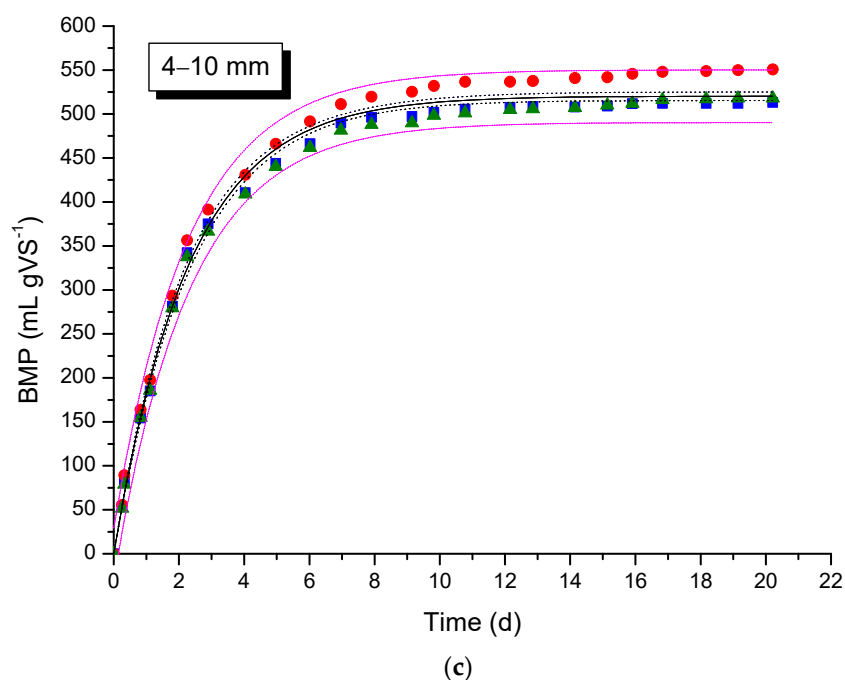

**Figure S5.** BMP of S3 mixture chopped in the 0–10 mm fraction (a) before and (b)–(c) after separation into two individual sub-fractions (0–4 mm and 4–10 mm, respectively). Points represent the experimental data obtained in three replicates. The lines depict the analysis of the first-order kinetics model fitting (black solid line: model, black dotted lines: confidence band at 95% confidence level, magenta dotted lines: prediction band at 95% confidence level.).

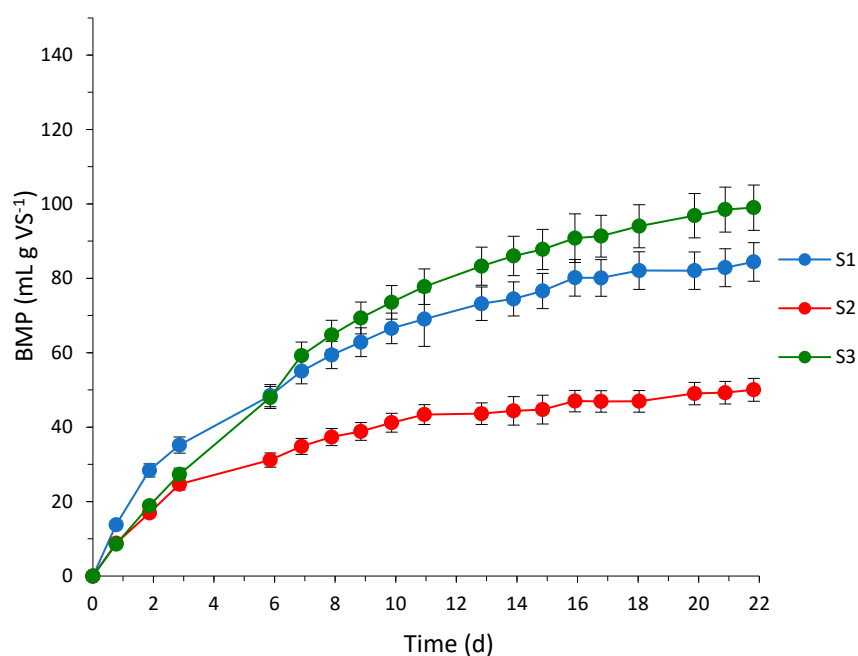

**Figure S6.** BMP of digestates.
